# Supplementary material
Source: PubMed Central journal article supplement (PMC4243160)
Supplement: NIHMS639532-supplement-01.pdf [file NIHMS639532-supplement-01.pdf]

## Appendix 1

### Full Definitions or Variables

Supplemental Digital Content Table 1. Diagnoses included within reported readmission diagnosis categories.

| <b>Readmission diagnosis</b>     | <b>Diagnoses included within readmission diagnosis category</b>                                                                                                                                                                                                                                           |
|----------------------------------|-----------------------------------------------------------------------------------------------------------------------------------------------------------------------------------------------------------------------------------------------------------------------------------------------------------|
| Wound complication               | wound infection/complication, surgical site infection, seroma, wound dehiscence of deep wound infection, and minor amputation/wound debridement                                                                                                                                                           |
| Infectious                       | infection, fever, abscess (not related to the wound), anastomotic leak, and pelvic sepsis/infection                                                                                                                                                                                                       |
| Gastrointestinal complications   | gastrointestinal/digestive system complications, peptic ulcer disease, enterocutaneous fistula, retained common bile duct stone, obstructive jaundice, nausea and vomiting, and gastrointestinal bleeding                                                                                                 |
| Gastrointestinal obstruction     | gastrointestinal obstruction and ileus                                                                                                                                                                                                                                                                    |
| Pain-related                     | abdominal pain, benign abdominal pain, pain with no clinical finding, and non-specific abdominal pain                                                                                                                                                                                                     |
| Surgical technical complications | technical complications, gastrostomy tube-related complications, reoperation, operative complications, reintervention for operative complication, AAA or graft-related, mechanical complications of vascular device, graft-related, device/aneurysm-related, and additional procedure needed in index leg |
| Fluid and Electrolytes related   | dehydration and dyselectrolytemia                                                                                                                                                                                                                                                                         |
| Cardiac                          | cardiovascular and cardiac complications                                                                                                                                                                                                                                                                  |
| Other                            | nonvascular reasons, unrelated medical/surgical, rehabilitation services, other causes, and miscellaneous                                                                                                                                                                                                 |
| Pulmonary                        | respiratory and pneumonia                                                                                                                                                                                                                                                                                 |
| Failure to thrive                | malnutrition and malaise                                                                                                                                                                                                                                                                                  |
| Hematological/oncological        | hematological and neoplasms                                                                                                                                                                                                                                                                               |



Supplemental Digital Content Table 2. Variables included within reported multivariate predictor category

| <b>Multivariate Predictor</b> | <b>Variables included within multivariate predictor category</b>                                                                                                                                                                       |
|-------------------------------|----------------------------------------------------------------------------------------------------------------------------------------------------------------------------------------------------------------------------------------|
| Postoperative complication    | in-hospital complications, postoperative complications, and postoperative complications not otherwise specified                                                                                                                        |
| Medication related            | total number of medications, >30 medications ordered and dispensed, diuretics, medications on discharge, and steroid use                                                                                                               |
| Comorbidity score             | comorbidity score, comorbidities, Charlson Comorbidity Score, and Hierarchical conditions category score                                                                                                                               |
| Procedure type                | extent of colectomy, 2-stage vs. 3-stage ileal anal pouch anastomosis, pancreatectomy vs. other general surgery procedures, select vascular procedures, and primary rectal procedure vs. nonrectal procedure                           |
| Transfusion                   | transfusion during index admission, transfusion during operation, and transfusion postoperatively                                                                                                                                      |
| Surgical approach             | open vs. laparoscopic and open vs. endovascular                                                                                                                                                                                        |
| Renal comorbidity             | history of renal failure, renal comorbidity, and dialysis                                                                                                                                                                              |
| Respiratory complications     | respiratory or pulmonary failure, pneumonia/respiratory failure, respiratory complication, and pneumonia                                                                                                                               |
| Cancer characteristics        | benign diagnosis, cancer stage, history of cancer, lymphoma, metastatic cancer, solid tumor without metastasis, and tumor grade                                                                                                        |
| Diagnosis on Index Admission  | certain vascular diagnoses, benign or malignant colorectal diagnoses, colon cancer or diverticulitis or inflammatory bowel disease, inflammatory bowel disease or rectal cancer or other diagnoses                                     |
| Cardiovascular comorbidity    | ischemic heart disease, peripheral vascular disease, coronary artery disease, congestive heart failure, hypertension, pulmonary circulation disease, valvular disease, and prior lower extremity bypass                                |
| Neurological comorbidity      | depression, pseudotumor cerebri, neurological disease, paralysis, and other neurological disorders                                                                                                                                     |
| Hematological comorbidity     | anemia, chronic blood loss anemia, deficiency anemia, coagulation disorder, deficiency anemia, and history of DVT/PE                                                                                                                   |
| Gastrointestinal comorbidity  | cholelithiasis, extraintestinal ulcerative colitis manifestations, intestinal obstruction on admission, intestinal perforation on admission, liver disease, enterocutaneous fistula, prior abdominal surgery, and peptic ulcer disease |

|                           |                                                                         |
|---------------------------|-------------------------------------------------------------------------|
| Emergent/Urgent operation | elective procedure, emergent/urgent operation, and non-elective repair. |
| Pulmonary comorbidity     | chronic pulmonary disease and COPD                                      |
| Obesity                   | obesity and BMI                                                         |
